A

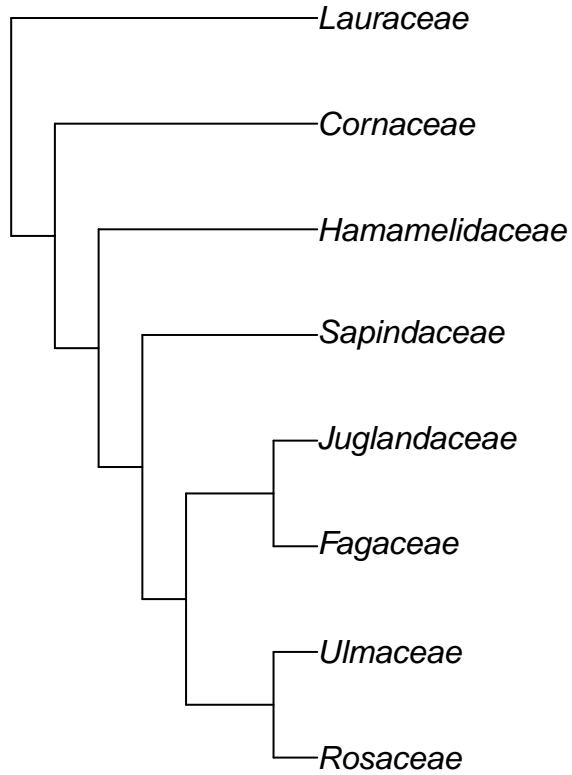

B

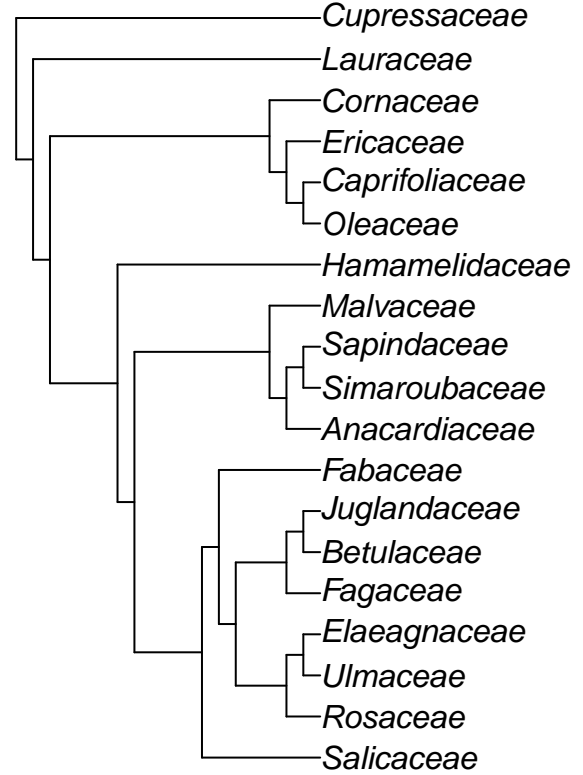

Source: https://storage.googleapis.com/plos-corpus-prod/10.1371/journal.pone.0229930/1/pone.0229930.s002.pdf
