**S2 Appendix Species list.**

| <b>Common name</b>            | <b>Scientific name</b>                  | <b>Family</b>   |
|-------------------------------|-----------------------------------------|-----------------|
| Alternate-leaf dogwood        | <i>Cornus alternifolia</i>              | Cornaceae       |
| American basswood             | <i>Tilia americana</i>                  | Tiliaceae       |
| American beech                | <i>Fagus grandifolia</i>                | Fagaceae        |
| American elm                  | <i>Ulmus americana</i>                  | Ulmaceae        |
| Autumn olive                  | <i>Elaeagnus umbellata</i>              | Elaeagnaceae    |
| Big tooth aspen               | <i>Populus grandidentata</i>            | Salicaceae      |
| Bitternut hickory             | <i>Carya cordiformis</i>                | Juglandaceae    |
| Black cherry                  | <i>Prunus serotina</i>                  | Rosaceae        |
| Black locust                  | <i>Robinia pseudoacacia</i>             | Fabaceae        |
| Black oak                     | <i>Quercus velutina</i>                 | Fagaceae        |
| Black walnut                  | <i>Juglans nigra</i>                    | Juglandaceae    |
| Black/northern pin oak hybrid | <i>Quercus velutina x ellipsoidalis</i> | Fagaceae        |
| Black/red oak hybrid          | <i>Quercus velutina x rubra</i>         | Fagaceae        |
| Choke cherry                  | <i>Prunus virginiana</i>                | Rosaceae        |
| Elderberry                    | <i>Sambucus canadensis</i>              | Adoxaceae       |
| Flowering dogwood             | <i>Cornus florida</i>                   | Cornaceae       |
| Gray dogwood                  | <i>Cornus racemosa</i>                  | Cornaceae       |
| Hawthorn                      | <i>Crataegus</i> sp                     | Rosaceae        |
| Hazelnut                      | <i>Corylus americana</i>                | Betulaceae      |
| Hophornbeam                   | <i>Ostrya virginiana</i>                | Betulaceae      |
| Juniper                       | <i>Juniperus communis</i>               | Cupressaceae    |
| Musclewood                    | <i>Carpinus caroliniana</i>             | Betulaceae      |
| Northern white cedar          | <i>Thuja occidentalis</i>               | Cupressaceae    |
| Pignut hickory                | <i>Carya glabra</i>                     | Juglandaceae    |
| Prickly gooseberry            | <i>Ribes cynosbati</i>                  | Grossulariaceae |
| Prickly ash                   | <i>Zanthoxylum americanum</i>           | Rutaceae        |
| Red maple                     | <i>Acer rubrum</i>                      | Sapindaceae     |
| Red oak                       | <i>Quercus rubra</i>                    | Fagaceae        |
| Sassafras                     | <i>Sassafras albidum</i>                | Lauraceae       |
| Serviceberry                  | <i>Amelanchier arborea</i>              | Rosaceae        |
| Shagbark hickory              | <i>Carya ovata</i>                      | Juglandaceae    |
| Silky dogwood                 | <i>Cornus amomum</i>                    | Cornaceae       |
| Spicebush                     | <i>Lindera benzoin</i>                  | Lauraceae       |
| Sugar maple                   | <i>Acer saccharum</i>                   | Sapindaceae     |
| Tree of heaven                | <i>Ailanthus altissima</i>              | Simaroubaceae   |
| White ash                     | <i>Fraxinus americana</i>               | Oleaceae        |
| White oak                     | <i>Quercus alba</i>                     | Fagaceae        |
| Witch hazel                   | <i>Hamamelis virginiana</i>             | Hamamelidaceae  |
| Yellow birch                  | <i>Betula alleghaniensis</i>            | Betulaceae      |
| Eastern red cedar             | <i>Juniperus virginiana</i>             | Cupressaceae    |
| Northern pin oak              | <i>Quercus ellipsoidalis</i>            | Fagaceae        |
