# Supplementary material for: A permutation test and spatial cross-validation approach to assess models of interspecific competition between trees
Source: PLOS journal article supplement (doi:10.1371/journal.pone.0229930), 2020-03-11
Supplement: S4 (10.1371/journal.pone.0229930.s004) [file journal.pone.0229930.s004]

## Supporting information

### S1 Appendix. Closed-form solutions for Bayesian Linear Regression.

Consider a standard linear model  $y_i = \beta_0 + \beta_1 x_{i,1} + \dots + \beta_p x_{i,p} + \epsilon_i$  for  $i = 1, \dots, n$  expressed in matrix form:

$$\mathbf{y} = X\boldsymbol{\beta} + \boldsymbol{\epsilon} \quad (9)$$

where

- $\mathbf{y} = [y_i]_{i=1}^n$  is the outcome variable vector of length  $n$ .
- $X = [\mathbf{x}_i^T]_{i=1}^n$  is the model matrix of dimension  $n \times (p+1)$  where we have a column of 1's for the intercept and  $p$  covariates.
- $\boldsymbol{\beta} = [\beta_j]_{j=0}^p$  is the population parameter vector of regression coefficients of length  $(p+1)$ .
- $\boldsymbol{\epsilon} = [\epsilon_i]_{i=1}^n \sim MVN(\mathbf{0}, \sigma^2 I_n)$  is the vector of random error terms, where  $\sigma^2$  is an unknown variance parameter.

thus we have a total of  $(p+1) + 1 = p+2$  parameters of interest.

**Normal/Inverse Gamma (NIG) conjugacy:** The analytic/closed-form solution to the posterior distribution of all  $p+2$  parameters of interest from the model above exploits Normal/Inverse Gamma (NIG) conjugacy of the following 4 parameters:

- $\boldsymbol{\mu}$  a mean hyperparameter vector for  $\boldsymbol{\beta}$  of length  $(p+1)$ .
- $V$  a covariance hyperparameter matrix for  $\boldsymbol{\beta}$  of dimension  $(p+1) \times (p+1)$ .
- $a$  a shape hyperparameter for  $\sigma^2$  which is a scalar  $> 0$ .
- $b$  a scale hyperparameter for  $\sigma^2$  which is a scalar  $> 0$ .

**Prior distribution:** After specifying prior hyperparameter values for  $\boldsymbol{\mu}_0$ ,  $V_0$ ,  $a_0 > 0$ , and  $b_0 > 0$  we have:

$$p(\boldsymbol{\beta}, \sigma^2) = \text{NIG}(\boldsymbol{\mu}_0, V_0, a_0, b_0) \quad (10)$$

$$= N(\boldsymbol{\mu}_0, \sigma^2 V_0) \times IG(a_0, b_0) \quad (11)$$

$$= p(\boldsymbol{\beta} | \sigma^2) \times p(\sigma^2) \quad (12)$$

where

$$p(\sigma^2) = \frac{b_0^{a_0}}{\Gamma(a_0)} \left( \frac{1}{\sigma^2} \right)^{a_0+1} \exp \left( -\frac{b_0}{\sigma^2} \right) \quad (13)$$

$$= \text{Inverse-Gamma}(a_0, b_0) \quad (14)$$

and

$$p(\boldsymbol{\beta}) = \int_0^\infty p(\boldsymbol{\beta} | \sigma^2) \times p(\sigma^2) d\sigma^2 \quad (15)$$

$$= \frac{\Gamma(\frac{\nu_0+p}{2})}{\Gamma(\frac{\nu_0}{2}) \pi^{p/2} |\nu_0 \Sigma|^{1/2}} \left[ 1 + \frac{(\boldsymbol{\beta} - \boldsymbol{\mu}_0)^T \Sigma^{-1} (\boldsymbol{\beta} - \boldsymbol{\mu}_0)}{\nu_0} \right]^{-\frac{\nu_0+p}{2}} \quad (16)$$

$$= \text{Multivariate } t_{df=\nu_0}(\boldsymbol{\mu}_0, \Sigma_0) \text{ for } \nu_0 = 2a_0 \text{ and } \Sigma_0 = \frac{b_0}{a_0} V_0 \quad (17)$$

**Posterior distribution:** Thus given the likelihood  $p(\mathbf{y}|\boldsymbol{\beta}, \sigma^2) = \text{MVN}(X\boldsymbol{\beta}, \sigma^2 I)$ , we have

$$p(\boldsymbol{\beta}, \sigma^2|\mathbf{y}) = \frac{p(\mathbf{y}|\boldsymbol{\beta}, \sigma^2)p(\boldsymbol{\beta}, \sigma^2)}{p(\mathbf{y})} \quad (18)$$

$$= \text{NIG}(\boldsymbol{\mu}^*, V^*, a^*, b^*) \quad (19)$$

$$p(\sigma^2|\mathbf{y}) = \text{Inverse-Gamma}(a^*, b^*) \quad (20)$$

$$p(\boldsymbol{\beta}|\mathbf{y}) = \text{Multivariate } t_{df=\nu^*}(\boldsymbol{\mu}^*, \Sigma^*) \text{ for } \nu^* = 2a^* \text{ and } \Sigma^* = \frac{b^*}{a^*} V^* \quad (21)$$

with posterior hyperparameter values

$$\boldsymbol{\mu}^* = (V_0^{-1} + X^T X)^{-1}(V_0^{-1} \boldsymbol{\mu}_0 + X^T \mathbf{y}) \quad (22)$$

$$V^* = (V_0^{-1} + X^T X)^{-1} \quad (23)$$

$$a^* = a_0 + \frac{n}{2} \quad (24)$$

$$b^* = b_0 + \frac{1}{2} [\boldsymbol{\mu}_0^T V_0^{-1} \boldsymbol{\mu}_0 + \mathbf{y}^T \mathbf{y} - \boldsymbol{\mu}^{*T} V^{*-1} \boldsymbol{\mu}^*] \quad (25)$$

**Posterior predictive distribution:** In a Bayesian framework, given a set of observed outcome variables  $\mathbf{y}$  the posterior predictive distribution of a new observations  $\tilde{\mathbf{y}}$  is [22]:

$$p(\tilde{\mathbf{y}}|\mathbf{y}) = \int_{\boldsymbol{\Theta}} p(\tilde{\mathbf{y}}, \boldsymbol{\Theta}|\mathbf{y}) d\boldsymbol{\Theta} = \int_{\boldsymbol{\Theta}} p(\tilde{\mathbf{y}}|\boldsymbol{\Theta}, \mathbf{y}) \times p(\boldsymbol{\Theta}|\mathbf{y}) d\boldsymbol{\Theta} \quad (26)$$

While a frequentist approach would use  $p(\tilde{\mathbf{y}}|\hat{\boldsymbol{\Theta}}, \mathbf{y})$  based on the maximum likelihood estimate vector  $\hat{\boldsymbol{\Theta}}$ , the above Bayesian posterior formulation accounts for the uncertainty about  $\boldsymbol{\Theta}$  by integrating  $p(\tilde{\mathbf{y}}|\boldsymbol{\Theta}, \mathbf{y})$  over the posterior distribution  $p(\boldsymbol{\Theta}|\mathbf{y})$ . Hence, the posterior predictive distribution will have higher variance.

In the case of our Bayesian linear regression model, we have  $\boldsymbol{\Theta} = \{\boldsymbol{\beta}, \sigma^2\}$ . For a new model matrix  $\tilde{X}$  of dimension  $m \times (p+1)$  based on  $m$  new observations we'd like to make a prediction  $\tilde{\mathbf{y}}$  for:

$$p(\tilde{\mathbf{y}}|\mathbf{y}) = \int p(\tilde{\mathbf{y}}, \boldsymbol{\beta}, \sigma^2|\mathbf{y}) d\boldsymbol{\beta} d\sigma^2 \quad (27)$$

$$= \int p(\tilde{\mathbf{y}}|\boldsymbol{\beta}, \sigma^2, \mathbf{y}) \times p(\boldsymbol{\beta}, \sigma^2|\mathbf{y}) d\boldsymbol{\beta} d\sigma^2 \quad (28)$$

$$= \int \text{MVN}(\tilde{X}\boldsymbol{\beta}, \sigma^2 I) \times \text{NIG}(\boldsymbol{\mu}^*, V^*, a^*, b^*) d\boldsymbol{\beta} d\sigma^2 \quad (29)$$

$$= \text{Multivariate } t_{df=\nu^*} \left( \tilde{X}\boldsymbol{\mu}^*, \frac{b^*}{a^*} (I + \tilde{X} V^* \tilde{X}^T) \right) \quad (30)$$
